# Supplementary material for: Aerosol-spray metal phosphide microspheres with bifunctional electrocatalytic properties for water splitting
Source: Royal Society of Chemistry journal article supplement (doi:10.1039/c7ta11312a), 2018-01-01
Supplement: c7ta11312a1.pdf [file c7ta11312a1.pdf]

## Electronic Supplementary Information

### Aerosol-spray metal phosphide microspheres with bifunctional electrocatalytic properties for water splitting

Henglei Jia,<sup>a</sup> Ruibin Jiang,<sup>b</sup> Wenzheng Lu,<sup>a</sup> Qifeng Ruan,<sup>a</sup> Jianfang Wang\*<sup>a</sup> and Jimmy C. Yu<sup>c</sup>

<sup>a</sup>Department of Physics, The Chinese University of Hong Kong, Shatin, Hong Kong SAR, China

<sup>b</sup>Shaanxi Engineering Lab for Advanced Energy Technology, School of Materials Science and Engineering, Shaanxi Normal University, Xi'an 710119, China

<sup>c</sup>Department of Chemistry, The Chinese University of Hong Kong, Shatin, Hong Kong SAR, China

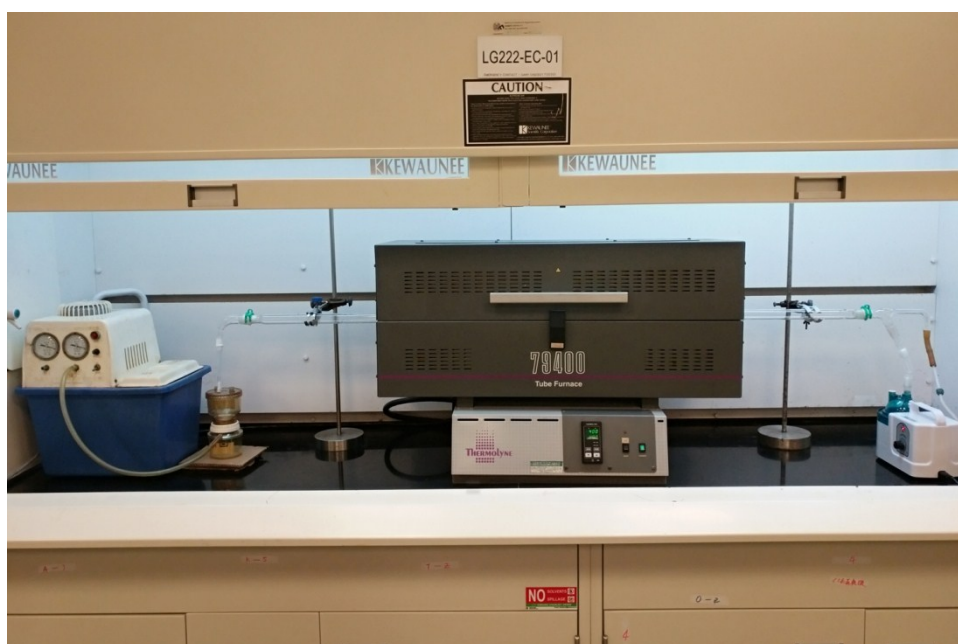

**Fig. S1** Photograph of the home-built setup for ultrasonic aerosol spray. The setup used for the preparation of mesoporous metal oxide microspheres is composed of three parts from right to left: a household ultrasonic humidifier, a tube furnace and a sample collection system. In the ultrasonic humidifier, the precursor solution is atomized by the ultrasonic wave to

generate discrete droplets, which are then carried by  $N_2$  into the tube furnace. In the tube furnace, the solvent evaporation-induced assembly process of the aerosol droplets takes place within 3–5 s, including solvent evaporation, the thermal decomposition of the inorganic metal salt and the self-assembly of the surfactant molecules with the decomposition product. The product is collected using a filter connected to a water pump, on the purpose of providing an extra driving force for the droplets.

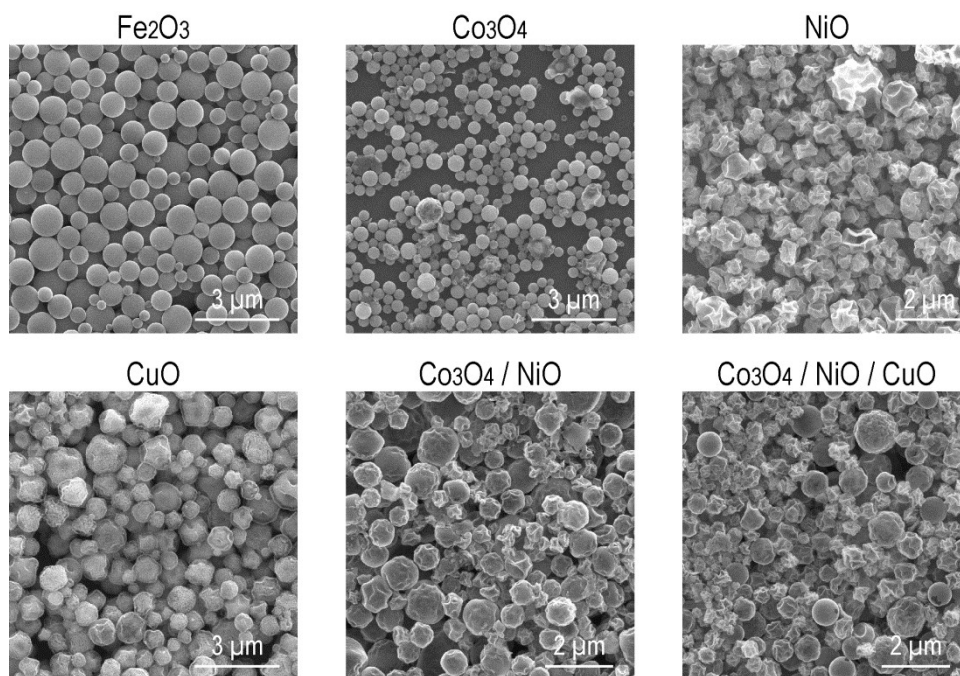

**Fig. S2** SEM images of the oxide microspheres. The shown images are for the  $Fe_2O_3$ ,  $Co_3O_4$ ,  $NiO$ ,  $CuO$ ,  $Co_3O_4/NiO$  and  $Co_3O_4/NiO/CuO$  samples, respectively.

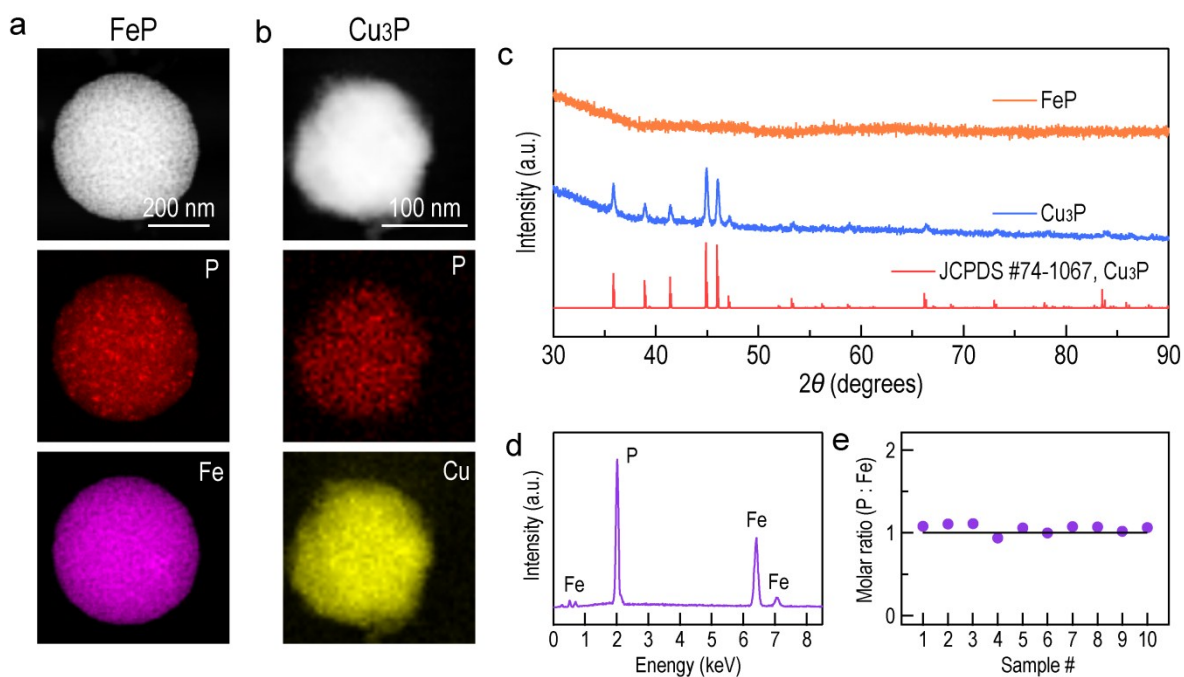

**Fig. S3** FeP and Cu<sub>3</sub>P microsphere samples. (a) HAADF-STEM image of a single FeP microsphere (top) and the corresponding elemental maps of P (middle) and Fe (bottom). (b) HAADF-STEM image of a single Cu<sub>3</sub>P microsphere (top) and the corresponding elemental maps of P (middle) and Cu (bottom). The scale bars on the HAADF-STEM images also apply for the elemental maps. (c) XRD patterns of the FeP and Cu<sub>3</sub>P samples, together with the standard diffraction pattern of Cu<sub>3</sub>P. (d) EDX spectrum of the FeP sample. (e) Molar ratios of P to Fe taken from ten random FeP samples.

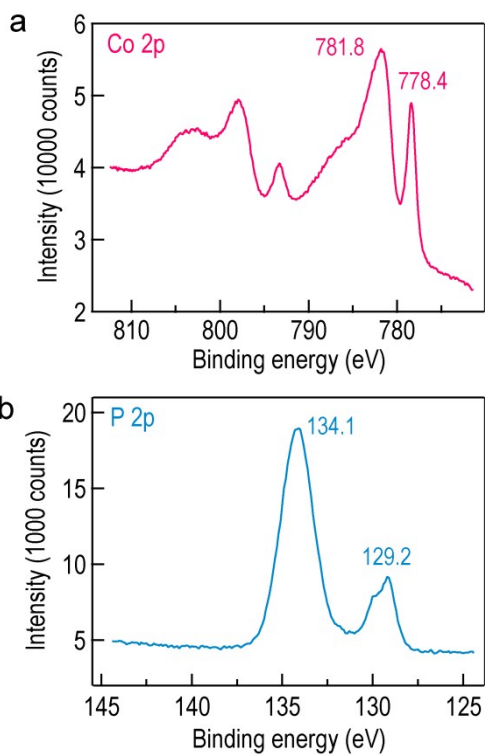

**Fig. S4** XPS characterization of the CoP sample. (a) Co 2p spectrum. (b) P 2p spectrum.

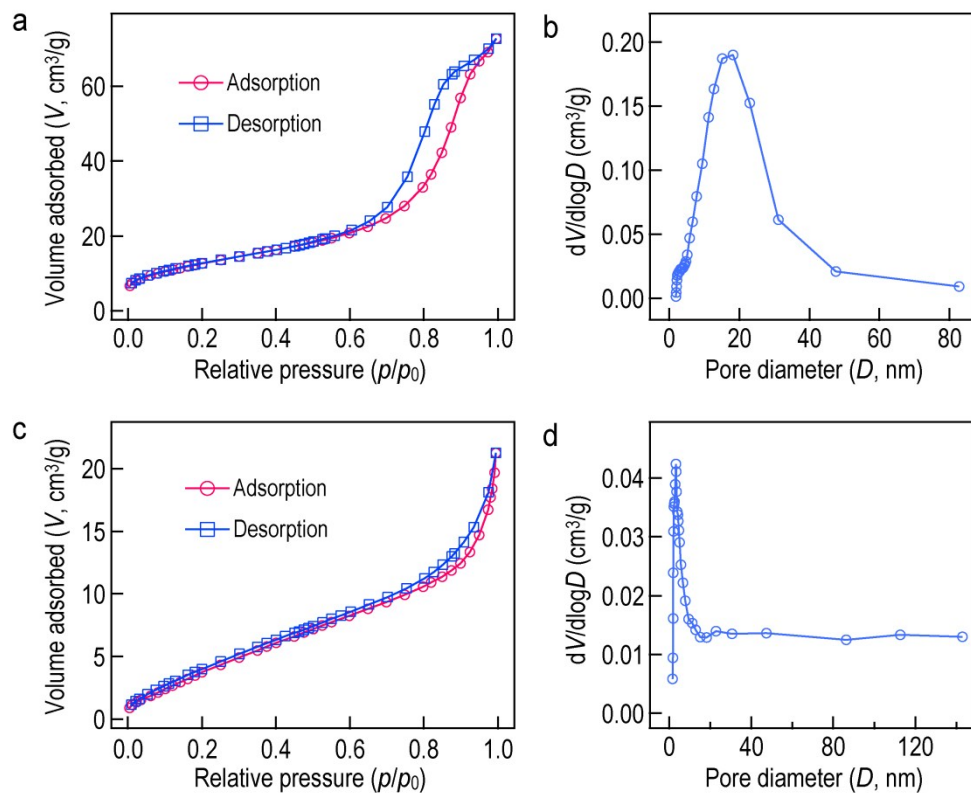

**Fig. S5** Mesoporosity of the FeP and CoP microsphere samples. (a) N<sub>2</sub> adsorption-desorption isotherm of the FeP sample. (b) BJH pore size distribution of the FeP sample. (c) N<sub>2</sub>

adsorption-desorption isotherm of the CoP sample. (d) BJH pore size distribution of the CoP sample.

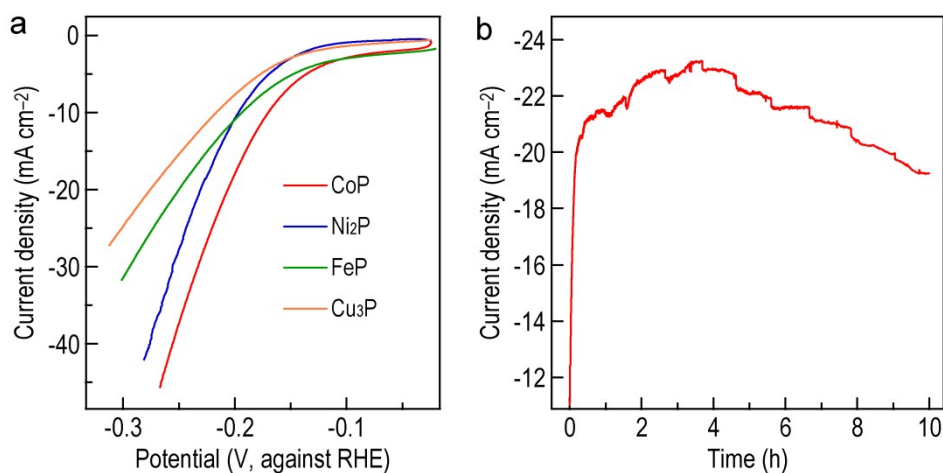

**Fig. S6** HER performance in basic solutions. (a) HER polarization curves of the CoP, Ni<sub>2</sub>P, FeP and Cu<sub>3</sub>P samples in 1.0 M KOH solutions. (b) Time-dependent current density curve of the CoP sample at an overpotential of 206 mV for 10 h.

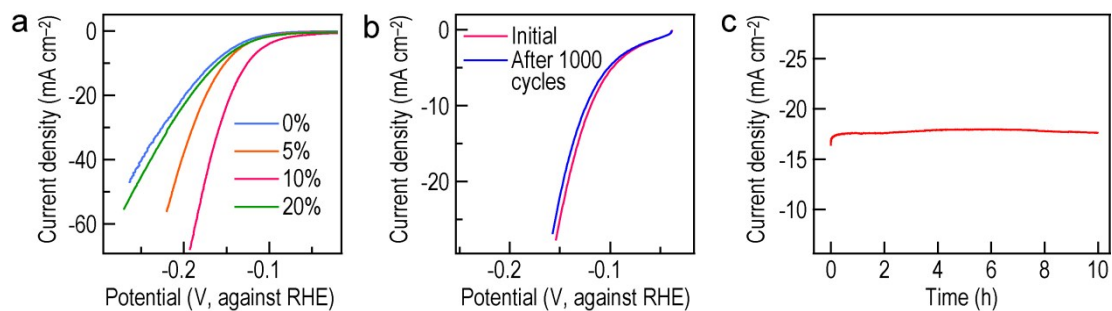

**Fig. S7** HER performance in acidic solutions. (a) HER polarization curves of the CoP samples doped with Cr<sub>2</sub>O<sub>3</sub> at different amounts in 0.5 M H<sub>2</sub>SO<sub>4</sub> solution. (b) HER polarization curves of the 10% Cr-CoP sample before and after the 1000-cycle continuous cyclic voltammetry scanning in 0.5 M H<sub>2</sub>SO<sub>4</sub> solution. (c) Time-dependent current density curve of the 10% Cr-CoP sample at a constant potential of 140 mV.

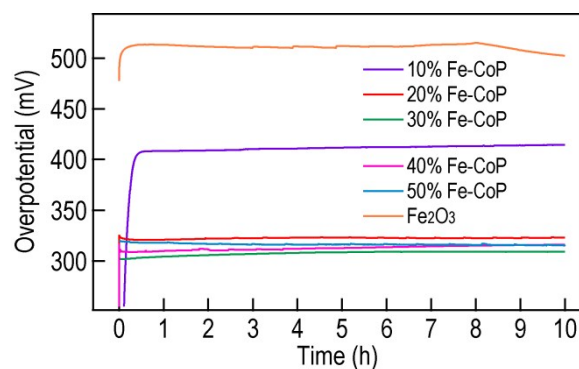

**Fig. S8** Chronopotentiometry curves of the different Fe-CoP samples in 1.0 M KOH solution at a constant current density of  $10 \text{ mA cm}^{-2}$  for 10 h. The curve of the 10% Fe-CoP sample was measured for  $\sim 2$  h and was extended to 10 h.

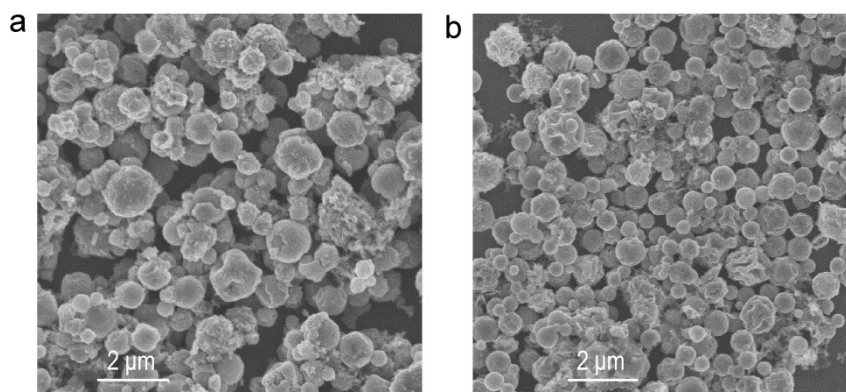

**Fig. S9** SEM images of the doped CoP catalysts after 10-h overall water splitting measurement in 1 M KOH solution. (a) 10% Cr-CoP. (b) 30% Fe-CoP.

**Table S1** Comparison of the HER catalytic activities among recently reported metal phosphide electrocatalysts in different shapes

| Catalyst                                                                         | $\eta_{10}$ (mV) <sup>a</sup>    | $\eta_{20}$ (mV) <sup>a</sup> | Electrolyte                                     | Mass loading (mg cm <sup>-2</sup> ) | Supporting electrode | Reference |
|----------------------------------------------------------------------------------|----------------------------------|-------------------------------|-------------------------------------------------|-------------------------------------|----------------------|-----------|
| Self-supported Ni <sub>3</sub> P <sub>4</sub> -Ni <sub>2</sub> P nanosheet array | 120                              | 140                           | 0.5 M H <sub>2</sub> SO <sub>4</sub>            | 68.2                                | Ni foam              | 1         |
| CoP nanowire arrays                                                              | 67<br>209                        | 100                           | 0.5 M H <sub>2</sub> SO <sub>4</sub><br>1 M KOH | 0.92                                | carbon cloth         | 2         |
| WP <sub>2</sub> submicroparticles                                                | 161                              |                               | 0.5 M H <sub>2</sub> SO <sub>4</sub>            | 0.5                                 | glassy carbon        | 3         |
| Bulk MoP                                                                         | 180 ( $\eta_{30}$ ) <sup>a</sup> |                               | 0.5 M H <sub>2</sub> SO <sub>4</sub>            | 0.86                                | glassy carbon        | 4         |
| Cu <sub>3</sub> P nanocubes                                                      | 145 (onset overpotential)        |                               | 0.5 M H <sub>2</sub> SO <sub>4</sub>            | 0.29                                | glassy carbon        | 5         |

|                                                                           |            |            |                                                 |                     |                      |           |
|---------------------------------------------------------------------------|------------|------------|-------------------------------------------------|---------------------|----------------------|-----------|
| MoP<br>nanooctahedrons@porous<br>carbon                                   | 153        |            | 0.5 M H <sub>2</sub> SO <sub>4</sub>            | 0.41                | glassy<br>carbon     | 6         |
| Ni <sub>5</sub> P <sub>4</sub> sheet                                      | 140<br>150 |            | 0.5 M H <sub>2</sub> SO <sub>4</sub><br>1 M KOH | grown on<br>Ni foam | Ni foam              | 7         |
| Hierarchically porous<br>urchin-like Ni <sub>2</sub> P<br>superstructures | 98         |            | 1 M KOH                                         | ~77.6               | Ni form              | 8         |
| Ni <sub>2</sub> P nanoparticles                                           | 220        |            | 1 M KOH                                         | 1.8                 | Ni foam              | 9         |
| FeP nanowire arrays                                                       | 55         | 72         | 0.5 M H <sub>2</sub> SO <sub>4</sub>            | 3.2                 | grown on Ti<br>plate | 10        |
| Branched CoP<br>nanostructures                                            |            | 117        | 0.5 M H <sub>2</sub> SO <sub>4</sub>            | 1                   | Ti foil              | 11        |
| Co <sub>2</sub> P nanorods                                                | 134        | 167<br>171 | 0.5 M H <sub>2</sub> SO <sub>4</sub><br>1 M KOH | 1                   | Ti foil              | 12        |
| Ni <sub>2</sub> P nanoparticles                                           |            | 130        | 0.5 M H <sub>2</sub> SO <sub>4</sub>            | 1                   | Ti foil              | 13        |
| Ni <sub>2</sub> P long nanowires                                          |            | 120        | 0.5 M H <sub>2</sub> SO <sub>4</sub>            | 0.3                 | glassy<br>carbon     | 14        |
| Janus Co/CoP                                                              | 178<br>193 | 195<br>225 | 0.5 M H <sub>2</sub> SO <sub>4</sub><br>1 M KOH | 0.88                | glassy<br>carbon     | 15        |
| CoP-based microspheres                                                    | 125<br>121 | 145<br>154 | 0.5 M H <sub>2</sub> SO <sub>4</sub><br>1 M KOH | 0.4                 | ITO glass<br>slide   | This work |

<sup>a</sup>  $\eta_{10}$ ,  $\eta_{20}$  and  $\eta_{30}$  refer to the overpotentials at HER current densities of 10, 20 and 30 mA cm<sup>-2</sup>, respectively.

## References

- 1 X. G. Wang, Y. V. Kolen'ko, X.-Q. Bao, K. Kovnir and L. F. Liu, *Angew. Chem., Int. Ed.*, 2015, **54**, 8188.
- 2 J. Q. Tian, Q. Liu, A. M. Asiri and X. P. Sun, *J. Am. Chem. Soc.*, 2014, **136**, 7587.
- 3 Z. C. Xing, Q. Liu, A. M. Asiri and X. P. Sun, *ACS Catal.*, 2015, **5**, 145.
- 4 P. Xiao, M. A. Sk, L. Thia, X. M. Ge, R. J. Lim, J.-Y. Wang, K. H. Lim and X. Wang, *Energy Environ. Sci.*, 2014, **7**, 2624.
- 5 L. B. Ma, X. P. Shen, H. Zhou, J. Zhu, C. Y. Xi, Z. Y. Ji and L. R. Kong, *RSC Adv.*, 2016, **6**, 9672.
- 6 J. Yang, F. J. Zhang, X. Wang, D. S. He, G. Wu, Q. H. Yang, X. Hong, Y. Wu and Y. D. Li, *Angew. Chem., Int. Ed.*, 2016, **55**, 12854.
- 7 M. Ledendecker, S. K. Calderón, C. Papp, H.-P. Steinrück, M. Antonietti and M. Shalom, *Angew. Chem., Int. Ed.*, 2015, **54**, 12361.
- 8 B. You, N. Jiang, M. L. Sheng, M. W. Bhushan and Y. J. Sun, *ACS Catal.*, 2016, **6**, 714.
- 9 L.-A. Stern, L. G. Feng, F. Song and X. L. Hu, *Energy Environ. Sci.*, 2015, **8**, 2347.
- 10 P. Jiang, Q. Liu, Y. H. Liang, J. Q. Tian, A. M. Asiri and X. P. Sun, *Angew. Chem., Int. Ed.*, 2014, **53**, 12855.
- 11 E. J. Popczun, C. W. Roske, C. G. Read, J. C. Crompton, J. M. McEnaney, J. F. Callejas, N. S. Lewis and R. E. Schaak, *J. Mater. Chem. A*, 2015, **3**, 5420.

- 12 Z. P. Huang, Z. Z. Chen, Z. B. Chen, C. C. Lv, M. G. Humphrey and C. Zhang, *Nano Energy*, 2014, **9**, 373.
- 13 E. J. Popczun, J. R. McKone, C. G. Read, A. J. Biacchi, A. M. Wiltrout, N. S. Lewis and R. E. Schaak, *J. Am. Chem. Soc.*, 2013, **135**, 9267.
- 14 Y.-H. Chung, K. Gupta, J.-H. Jang, H. S. Park, I. Jang, J. H. Jang, Y.-K. Lee, S.-C. Lee and S. J. Yoo, *Nano Energy*, 2016, **26**, 496.
- 15 Z.-H. Xue, H. Su, Q.-Y. Yu, B. Zhang, H.-H. Wang, X.-H. Li and J.-S. Chen, *Adv. Energy Mater.*, 2017, **7**, 1602355.

**Table S2** Comparison of the OER catalytic activities among recently reported metal phosphide electrocatalysts in different shapes

| Catalyst                                                            | $\eta_{10}$ (mV) <sup>a</sup> | Electrolyte | Mass loading (mg cm <sup>-2</sup> ) | Supporting electrode | Reference |
|---------------------------------------------------------------------|-------------------------------|-------------|-------------------------------------|----------------------|-----------|
| NiCoP/C nanoboxes                                                   | 330                           | 1 M KOH     | 0.255                               | glassy carbon        | 1         |
| Hierarchically porous urchin-like Ni <sub>2</sub> P superstructures | 200                           | 1 M KOH     | ~77.6                               | Ni foam              | 2         |
| Janus Co/CoP                                                        | 283                           | 1 M KOH     | 0.88                                | glassy carbon        | 3         |
| Ni <sub>5</sub> P <sub>4</sub> sheets                               | ~320                          | 1 M KOH     | grown on Ni foam                    | Ni foam              | 4         |
| Crystalline Cu <sub>3</sub> P nanosheets                            | 320                           | 1 M KOH     | 1.2                                 | Ni foam              | 5         |
| Ni <sub>2</sub> P nanoparticles                                     | 290                           | 1 M KOH     | 0.14                                | glassy carbon        | 6         |
| Fe-Co-P alloy hollow spheres                                        | 252                           | 1 M KOH     | 0.2                                 | glassy carbon        | 7         |
| Co-P film                                                           | 345                           | 1 M KOH     | 2.71                                | Cu foil              | 8         |
| NiCoP/reduced graphene oxide hybrids                                | 270                           | 1 M KOH     | 0.15                                | carbon fiber paper   | 9         |
| CoP hollow polyhedrons                                              | 400                           | 1 M KOH     | 0.102                               | glassy carbon        | 10        |
| Flower-like CoP/CoP <sub>2</sub> /Al <sub>2</sub> O <sub>3</sub>    | 300                           | 1 M KOH     | 0.2                                 | carbon paper         | 11        |
| Co <sub>2</sub> P                                                   | 319                           | 1 M KOH     | grown on Co foil                    | Co foil              | 12        |
| CoP nanorods                                                        | 320                           | 1 M KOH     | 0.71                                | glassy carbon        | 13        |
| Ni-P porous nanoplates                                              | 300                           | 1 M KOH     | 0.2                                 | glassy carbon        | 14        |
| Ag@Co <sub>x</sub> P core@shell nanostructures                      | 310                           | 1 M KOH     | 3.4                                 | glassy carbon        | 15        |
| CoP-based microspheres                                              | 302                           | 1 M KOH     | 0.4                                 | ITO glass slide      | This work |

<sup>a</sup> $\eta_{10}$  = overpotential at an OER current density of 10 mA cm<sup>-2</sup>.

<sup>a</sup>  $\eta_{10}$  refers to the overpotential at an OER current density of 10 mA cm<sup>-2</sup>.

## References

- 1 P. L. He, X.-Y. Yu and X. W. Lou, *Angew. Chem., Int. Ed.*, 2017, **56**, 3897.
- 2 B. You, N. Jiang, M. L. Sheng, M. W. Bhushan and Y. J. Sun, *ACS Catal.*, 2016, **6**, 714.
- 3 Z.-H. Xue, H. Su, Q.-Y. Yu, B. Zhang, H.-H. Wang, X.-H. Li and J.-S. Chen, *Adv. Energy Mater.*, 2017, **7**, 1602355.
- 4 M. Ledendecker, S. K. Calderón, C. Papp, H.-P. Steinrück, M. Antonietti and M. Shalom, *Angew. Chem., Int. Ed.*, 2015, **54**, 12361.



- 5 A. Han, H. Y. Zhang, R. H. Yuan, H. X. Ji and P. W. Du, *ACS Appl. Mater. Interfaces*, 2017, **9**, 2240.
- 6 L.-A. Stern, L. G. Feng, F. Song and X. L. Hu, *Energy Environ. Sci.*, 2015, **8**, 2347.
- 7 K. W. Liu, C. L. Zhang, Y. D. Sun, G. H. Zhang, X. C. Shen, F. Zou, H. C. Zhang, Z. W. Wu, E. C. Wegener, C. J. Taubert, J. T. Miller, Z. M. Peng and Y. Zhu, *ACS Nano*, 2018, **12**, 158.
- 8 N. Jiang, B. You, M. L. Sheng and Y. J. Sun, *Angew. Chem., Int. Ed.*, 2015, **54**, 6251.
- 9 J. Y. Li, M. Yan, X. M. Zhou, Z.-Q. Huang, Z. M. Xia, C.-R. Chang, Y. Y. Ma and Y. Q. Qu, *Adv. Funct. Mater.*, 2016, **26**, 6785.
- 10 M. J. Liu and J. H. Li, *ACS Appl. Mater. Interfaces*, 2016, **8**, 2158.
- 11 W. Li, S. L. Zhang, Q. N. Fan, F. Z. Zhang and S. L. Xu, *Nanoscale*, 2017, **9**, 5677.
- 12 C.-Z. Yuan, S.-L. Zhong, Y.-F. Jiang, Z. K. Yang, Z.-W. Zhao, S.-J. Zhao, N. Jiang and A.-W. Xu, *J. Mater. Chem. A*, 2017, **5**, 10561.
- 13 J. F. Chang, Y. Xiao, M. L. Xiao, J. J. Ge, C. P. Liu and W. Xing, *ACS Catal.*, 2015, **5**, 6874.
- 14 X.-Y. Yu, Y. Feng, B. Y. Guan, X. W. Lou and U. Paik, *Energy Environ. Sci.*, 2016, **9**, 1246.
- 15 Y. H. Hou, Y. P. Liu, R. Q. Gao, Q. J. Li, H. Z. Guo, A. Goswami, R. Zboril, M. B. Gawande and X. X. Zou, *ACS Catal.*, 2017, **7**, 7038.

**Table S3** Comparison of the electrocatalytic activities towards overall water splitting among recently reported metal phosphides

| Sample                                                                                            | Current density (mA cm <sup>-2</sup> ) | Voltage (V) | Electrolyte | Mass loading (mg cm <sup>-2</sup> ) | Supporting electrode | Reference |
|---------------------------------------------------------------------------------------------------|----------------------------------------|-------------|-------------|-------------------------------------|----------------------|-----------|
| Three-dimensional hierarchically porous urchin-like Ni <sub>2</sub> P microsphere superstructures | 10                                     | 1.49        | 1 M KOH     | 77.6                                | Ni foam              | 1         |
|                                                                                                   | 20                                     | 1.54        |             |                                     |                      |           |
|                                                                                                   | 50                                     | 1.63        |             |                                     |                      |           |
|                                                                                                   | 100                                    | 1.68        |             |                                     |                      |           |
| MoP/CC and CoP/CC                                                                                 | 40                                     | 1.6         | 1 M KOH     |                                     | Carbon cloth         | 2         |
| Ni <sub>2</sub> P nanoparticles                                                                   | 10                                     | 1.63        | 1 M KOH     | 5                                   | Ni foam              | 3         |
| CoP film                                                                                          | 100                                    | 1.744       | 1 M KOH     | 2.7                                 | Copper foil          | 4         |
| NiCoP                                                                                             | 10                                     | 1.58        | 1 M KOH     | 1.6                                 | Ni foam              | 5         |
|                                                                                                   | 100                                    | 1.82        |             |                                     |                      |           |
|                                                                                                   | 200                                    | 1.98        |             |                                     |                      |           |
| Janus Co/CoP nanoparticles                                                                        | 10                                     | 1.45        | 1 M KOH     | 5                                   | Ni foam              | 6         |
|                                                                                                   | 20                                     | 1.66        |             |                                     |                      |           |
| NiCoP/reduced graphene oxide hybrids                                                              | 10                                     | 1.59        | 1 M KOH     | 0.15                                | Carbon fiber paper   | 7         |
| Co <sub>2</sub> P/Co foil                                                                         | 10                                     | 1.71        | 1 M KOH     | grown on Co foil                    | Co foil              | 8         |

|                                                                     |     |       |         |     |                        |           |
|---------------------------------------------------------------------|-----|-------|---------|-----|------------------------|-----------|
| Flower-like<br>CoP/CoP <sub>2</sub> /Al <sub>2</sub> O <sub>3</sub> | 20  | 1.69  | 1 M KOH | 0.2 | Carbon<br>paper        | 9         |
| CoP nanowires                                                       | 10  | 1.56  | 1 M KOH | 3   | Co foam                | 10        |
|                                                                     | 100 | 1.78  |         |     |                        |           |
| CoP nanorod-based<br>electrode                                      | 10  | 1.587 | 1 M KOH | 5   | Titanium<br>felt sheet | 11        |
| Three-dimensional porous<br>Ni/NiP                                  | 10  | 1.61  | 1 M KOH |     | Ni foam                | 12        |
| CoP-based bifunctional<br>electrocatalysts                          | 50  | 1.47  | 1 M KOH | 1   | Ni foam                | This work |
|                                                                     | 100 | 1.67  |         |     |                        |           |

## References

- 1 B. You, N. Jiang, M. L. Sheng, M. W. Bhushan and Y. J. Sun, *ACS Catal.*, 2016, **6**, 714.
- 2 G. Zhang, G. C. Wang, Y. Liu, H. J. Liu, J. H. Qu and J. H. Li, *J. Am. Chem. Soc.*, 2016, **138**, 14686.
- 3 L.-A. Stern, L. G. Feng, F. Song and X. L. Hu, *Energy Environ. Sci.*, 2015, **8**, 2347.
- 4 N. Jiang, B. You, M. L. Sheng and Y. J. Sun, *Angew. Chem., Int. Ed.*, 2015, **54**, 6251.
- 5 H. F. Liang, A. N. Gandi, D. H. Anjum, X. B. Wang, U. Schwingenschlögl and H. N. Alshareef, *Nano Lett.*, 2016, **16**, 7718.
- 6 Z.-H. Xue, H. Su, Q.-Y. Yu, B. Zhang, H.-H. Wang, X.-H. Li and J.-S. Chen, *Adv. Energy Mater.*, 2017, **7**, 1602355.
- 7 J. Y. Li, M. Yan, X. M. Zhou, Z.-Q. Huang, Z. M. Xia, C.-R. Chang, Y. Y. Ma and Y. Q. Qu, *Adv. Funct. Mater.*, 2016, **26**, 6785.
- 8 C.-Z. Yuan, S.-L. Zhong, Y.-F. Jiang, Z. K. Yang, Z.-W. Zhao, S.-J. Zhao, N. Jiang and A.-W. Xu, *J. Mater. Chem. A*, 2017, **5**, 10561.
- 9 W. Li, S. L. Zhang, Q. N. Fan, F. Z. Zhang and S. L. Xu, *Nanoscale*, 2017, **9**, 5677.
- 10 W. Li, X. F. Gao, D. H. Xiong, F. Xia, J. Liu, W.-G. Song, J. Y. Xu, S. M. Thalluri, M. F. Cerqueira, X. L. Fu and L. F. Liu, *Chem. Sci.*, 2017, **8**, 2952.
- 11 J. F. Chang, Y. Xiao, M. L. Xiao, J. J. Ge, C. P. Liu and W. Xing, *ACS Catal.*, 2015, **5**, 6874.
- 12 G.-F. Chen, T. Y. Ma, Z.-Q. Liu, N. Li, Y.-Z. Su, K. Davey and S.-Z. Qiao, *Adv. Funct. Mater.*, 2016, **26**, 3314.
